# Supplementary material for: A one-pot sol–gel process to prepare a superhydrophobic and environment-resistant thin film from ORMOSIL nanoparticles
Source: Royal Society of Chemistry journal article supplement (doi:10.1039/c3ra47185c), 2014-01-01
Supplement: c3ra47185c.pdf [file c3ra47185c.pdf]

## The transmittance of FM0.4

As shown in Figure 1, the transmittance of FM0.4 is only about 98.9%. The refractive index of FM0.4 is about 1.12. The reflection of a thin film can be calculated by the following equation:

$$R=(n_c^2-n_a n_s)^2/(n_c^2+n_a n_s)^2$$

where  $n_c$ ,  $n_a$  and  $n_s$  are the refractive indices of the coating, air and substrate, respectively. The calculated transmittance is in good agreement with that characterized by UV-vis spectrophotometer. This means that the low refractive index of FM0.4 is determined by the refractive index but not caused by the light scatter.

For glass substrate, to obtain 100% transmittance, the refractive index of single-layer AR coating should be about 1.22. Many researches had engaged in preparation of ORMOSIL thin films from co-condensation of DDS and TEOS. However, they did not use these thin films as AR coating in high power laser system was probably because the refractive index is far from the theoretical value (1.22). Due to the ultra-low refractive index of 1.12, the transmittance of this ORMSIL AR coating (i.e. FM0.4 in this work) is poor. In our group, we applied a second layer between the glass substrate and FM0.4 to increase the transmittance to 100%. The schematical representation of this double-layer AR coating is shown in Figure 2. Table 1 shows some double-layer AR coatings with FM0.4 as top layer and bottom layer with different refractive indices. As shown in Table 1, The refractive index of double-layer AR coatings with FM0.4 as top layer possess almost 100% transmittance.

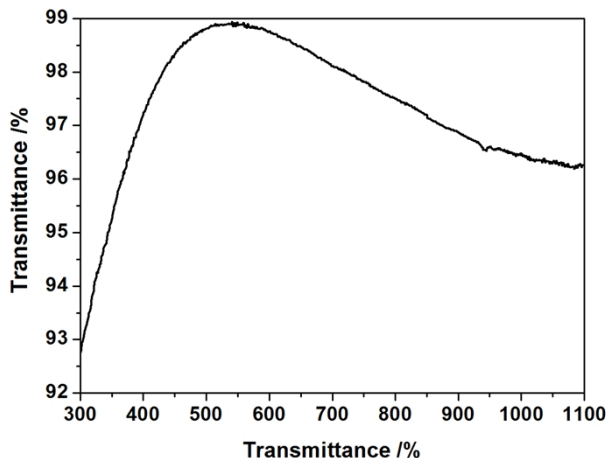

Figure 1 Transmittance spectrum of FM0.4

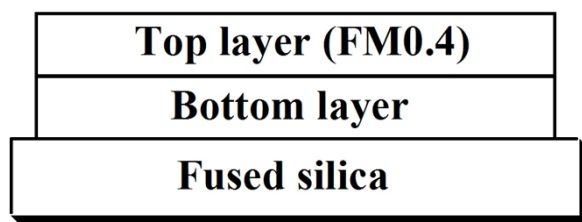

Figure 2 Schematic representation of double-layer AR coating

**Table 1** Double-layer AR coatings with FM0.4 as top layer

| Sample<br>number | bottom layer |               | top layer (FM0.4) |               | $T_{1064\text{ nm}}$<br>[%] | $T_{532\text{ nm}}$<br>[%] |
|------------------|--------------|---------------|-------------------|---------------|-----------------------------|----------------------------|
|                  | $n_1$        | Thickness[nm] | $n_2$             | Thickness[nm] |                             |                            |
| C1               | 1.27         | 139.8         | 1.12              | 158.5         | 99.97                       | 99.97                      |
| C2               | 1.28         | 138.7         | 1.12              | 158.5         | 99.98                       | 99.98                      |
| C3               | 1.29         | 137.6         | 1.12              | 158.5         | 99.96                       | 99.96                      |
| C4               | 1.30         | 136.5         | 1.12              | 158.5         | 99.94                       | 99.94                      |
